# Supplementary material for: Clodronate-nintedanib-loaded exosome–liposome hybridization enhances the liver fibrosis therapy by inhibiting Kupffer cell activity
Source: Royal Society of Chemistry journal article supplement (doi:10.1039/d1bm01663f), 2021-12-20
Supplement: d1bm01663f1.pdf [file d1bm01663f1.pdf]

## Supporting Information

(Replaces the original version published on 20 Dec 2021 – Fig. S2 and  
Fig. S3 updated)

### **Clodronate-nintedanib-loaded exosome-liposome hybridization enhances liver fibrosis therapy by inhibiting Kupffer cell activity**

Keqin Ji<sup>a</sup>, Mingrui Fan<sup>a</sup>, Dong Huang<sup>a</sup>, Lingna Sun<sup>a</sup>, Bingqin Li<sup>a</sup>, Ruoting  
Xu<sup>a</sup>, Jiajing Zhang<sup>a</sup>, Xuan Shao<sup>a</sup>, Yanzuo Chen\*<sup>a, b</sup>

<sup>a</sup>*Shanghai Key Laboratory of Functional Materials Chemistry, East China University  
of Science and Technology, Shanghai 200237, China. E-mail: chenyz@ecust.edu.cn*

<sup>b</sup>*Engineering Research Centre of Pharmaceutical Process Chemistry, Ministry of  
Education, Shanghai Key Laboratory of New Drug Design, School of Pharmacy, East  
China University of Science and Technology, Shanghai 200237, China.*

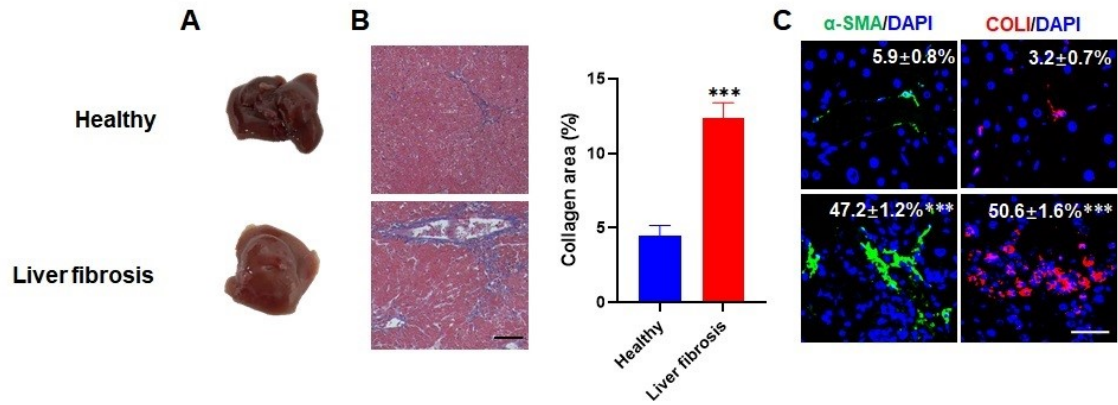

**Fig. S1** Liver fibrosis model was successfully established in mice. (A) Representative photos of livers of healthy mice and in mice with liver fibrosis. (B) Masson-stained of liver sections and quantification of the presence of collagen.  $*P < 0.05$ ,  $**P < 0.01$ ,  $***P < 0.001$ . (C) Immunofluorescent staining of  $\alpha$ -SMA and collagen I. Data are mean  $\pm$  SD,  $n = 3$ ;  $*P < 0.05$ ,  $**P < 0.01$ ,  $***P < 0.001$ , compared to healthy mice. Scale bar = 50  $\mu$ m.

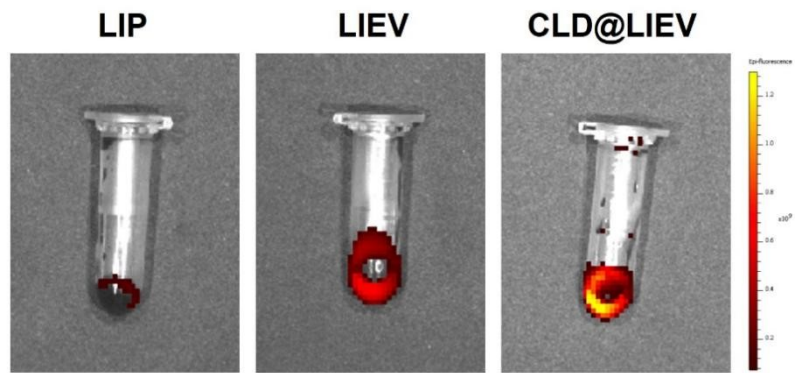

**Fig. S2** Fluorescence images of blood samples 4 h after intravenous injection of DiD labeled liposomes in healthy mice.

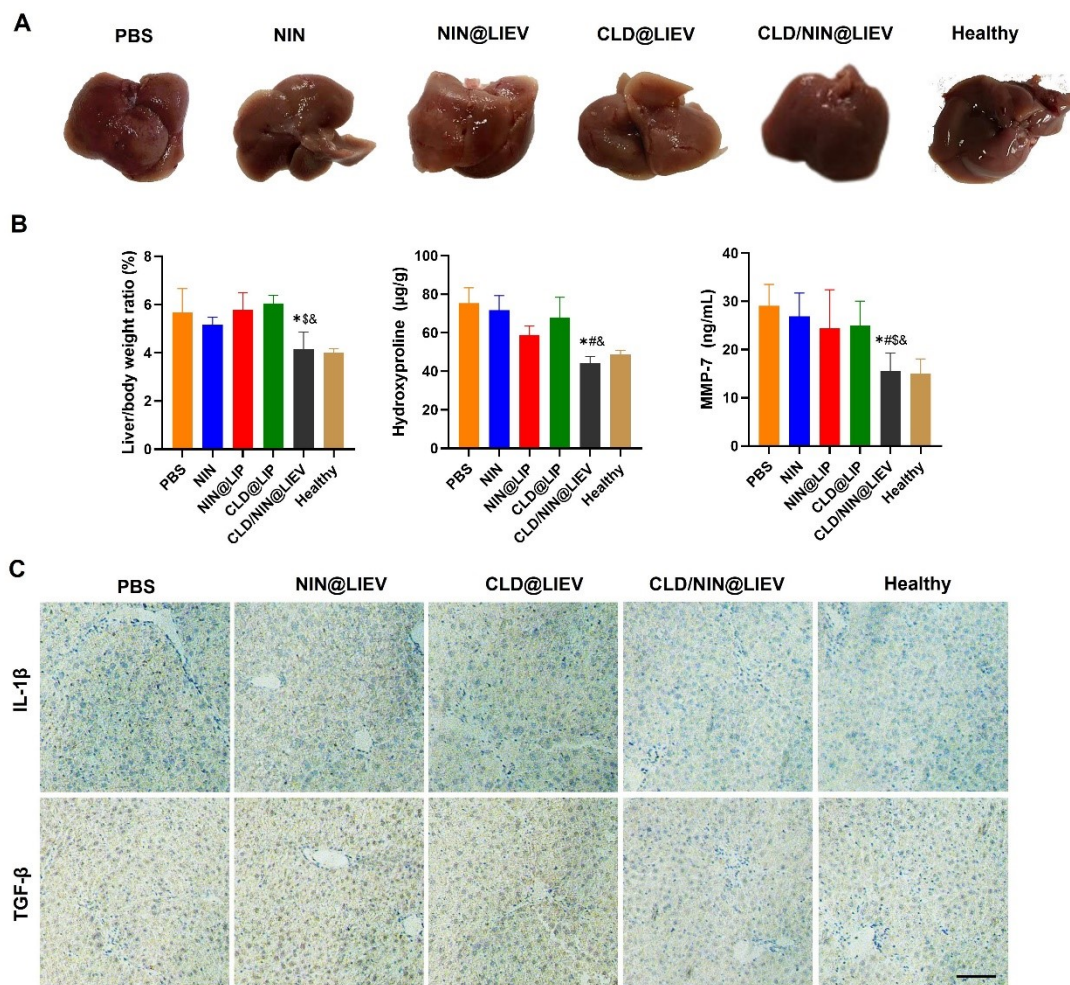

**Fig. S3** Anti-fibrosis efficacy of CLD/NIN@LIEV. (A) Representative photos of mouse livers. (B) The liver weight-to-body weight ratio, hydroxyproline content, and MMP-7 expression after treatment. \* $P < 0.05$ , # $P < 0.05$ , § $P < 0.05$ , & $P < 0.05$ , compared to PBS, NIN, NIN@LIEV and CLD@LIEV treatment, respectively. (C) IL-1 $\beta$  and TGF- $\beta$  immunohistochemistry. Data are mean  $\pm$  SD,  $n = 3$ . Scale bar = 50  $\mu\text{m}$ .

**Table S1.** Antibodies used in the study.

| Antibody            | Company    | Catalog   | Application |
|---------------------|------------|-----------|-------------|
| Anti-F4/80          | Servicebio | GB11027   | IF          |
| Anti- $\alpha$ -SMA | Servicebio | GB13044   | IF          |
| Anti-CD31           | Servicebio | GB11063-1 | IF          |
| Anti-HNF-4 $\alpha$ | Abcam      | ab201460  | IF          |
| Anti-Collagen I     | Servicebio | GB11022-3 | IF          |
| Anti-CD86           | Abcam      | ab238468  | IF          |
| Anti-CD163          | Servicebio | GB11340-1 | IF          |
| Anti-IL-1 $\beta$   | Servicebio | GB11113   | IHC         |
| Anti-TGF- $\beta$   | Servicebio | GB13028   | IHC         |
